# Supplementary material for: Oxidant/Antioxidant Status Is Impaired in Sepsis and Is Related to Anti-Apoptotic, Inflammatory, and Innate Immunity Alterations
Source: MDPI journal article supplement (doi:10.3390/antiox11020231), 2022-01-25
Supplement: s1 [file s1]

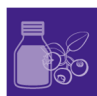

**Supplemental Table S1.** Propensity probability logistic regression model adjusted for predicted probabilities of covariates age and sex. Dependent variable: TOS/TAC defined by the “optimal” cut off point TOS/TAC value; independent variables: predicted probability of age and sex, diagnostic categories (sepsis, non-septic ICU patients, and healthy controls), the severity of illness (SOFA score) and alarmin Hsp72.

|        |                       | Variables in the Equation |       |        |    |       |        |                     |        |
|--------|-----------------------|---------------------------|-------|--------|----|-------|--------|---------------------|--------|
|        |                       | B                         | S.E.  | Wald   | df | Sig.  | Exp(B) | 95% C.I. for EXP(B) |        |
| Step 1 | Diagnosis_code        | 3.236                     | .566  | 32.637 | 1  | <.001 | 25.429 | 8.379               | 77.172 |
|        | HSP72                 | .179                      | .156  | 1.321  | 1  | .250  | 1.196  | .881                | 1.623  |
|        | Predicted probability | -.809                     | .930  | .756   | 1  | .385  | .446   | .072                | 2.756  |
|        | SOFA score            | -.038                     | .071  | .287   | 1  | .592  | .963   | .838                | 1.106  |
|        | Constant              | -7.633                    | 1.286 | 35.211 | 1  | <.001 | .000   |                     |        |
